# Supplementary material for: ZNF224, Krüppel like zinc finger protein, induces cell growth and apoptosis-resistance by down-regulation of p21 and p53 via miR-663a
Source: PubMed Central journal article supplement (PMC5058748; doi:10.18632/oncotarget.8870), 2016-04-20
Supplement: oncotarget-07-31177-s001.pdf [file oncotarget-07-31177-s001.pdf]

## SUPPLEMENTARY FIGURES AND TABLES

**A**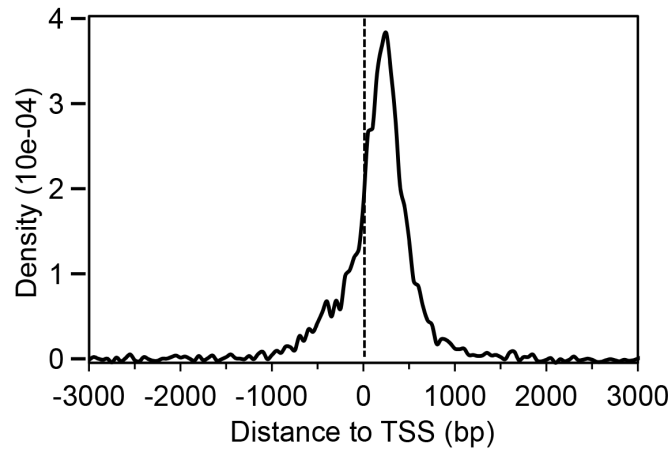**B**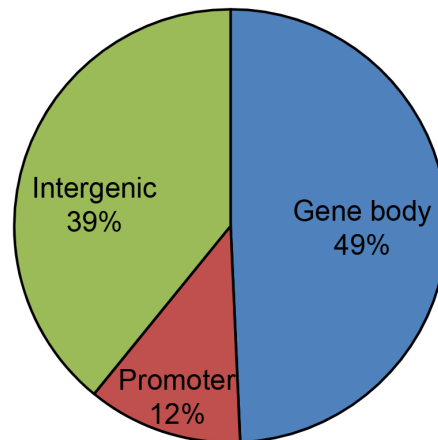

**Supplementary Figure S1: Distribution of ZNF224 enriched regions within the ChIP-Seq library.** **A.** Density plot depicting the distribution of enriched regions that are  $\pm 1.0$  kb from the transcription start site (TSS). **B.** The binding distribution of ZNF224 was calculated in the promoter ( $\pm 1$  kb regions from TSS), gene body, and intergenic regions.

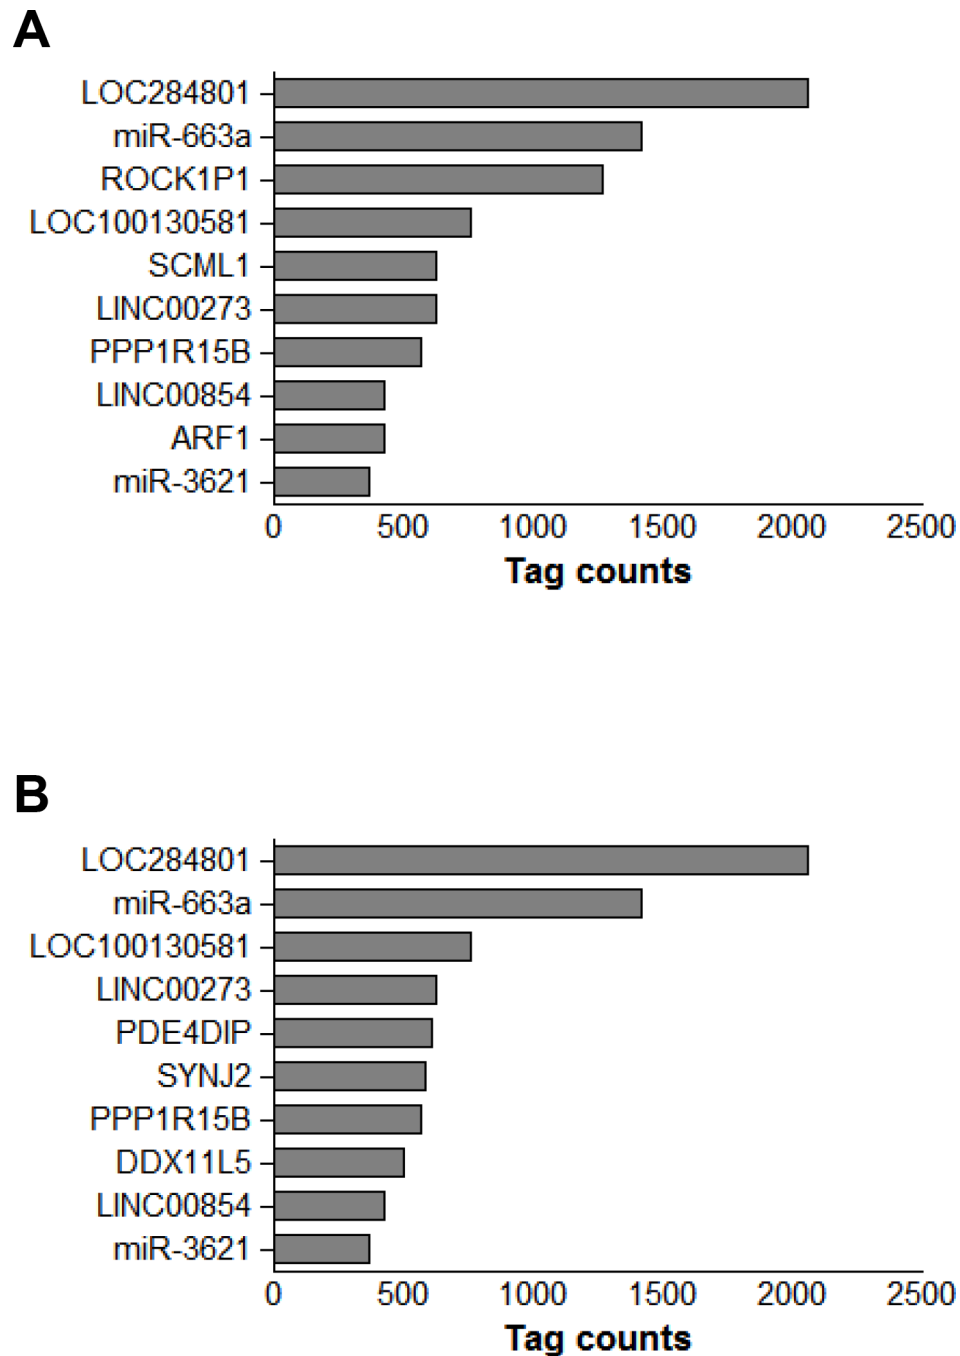

**Supplementary Figure S2: List of Top 10 hits from ChIP sequencing.** A. Top 10 tags containing 5'-CAGC-3' among promoter enriched tags of ChIP sequencing. B. Top 10 candidates from promoter enriched tags of ChIP sequencing.

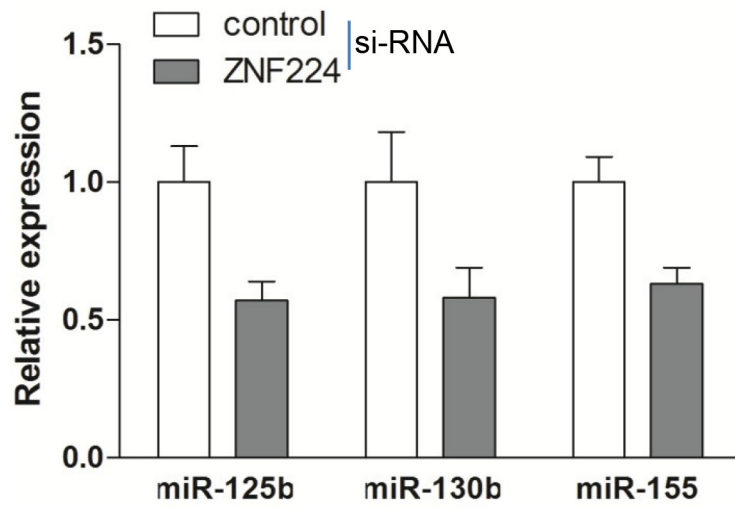

**Supplementary Figure S3: Expression of micro-RNA in microarray.** Control or ZNF224 siRNA (20 nM) was transfected into MCF-7 cells for 48 h, and the expression levels of miR-125b, miR-130b, and miR-155 were examined.

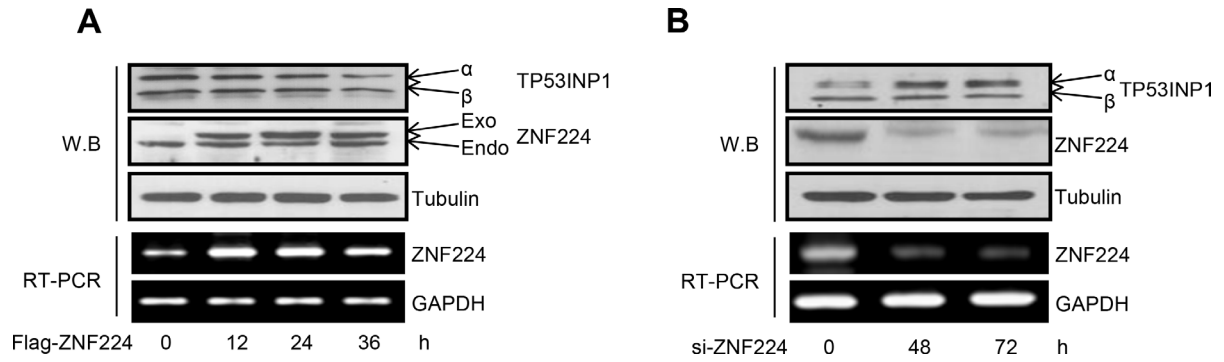

**Supplementary Figure S4: ZNF24 regulates the expression of TP53INP1.** A-B. FLAG-ZNF224 (2 μg) or ZNF224 si-RNA (20 nM) was transfected into MCF-7 cells for the indicated time. Total RNA and protein extracts were subjected to RT-PCR and immunoblot, respectively. GAPDH and tubulin were used as loading control in RT-PCR and immunoblot, respectively. Data are from at least three independent experiments (n=3).

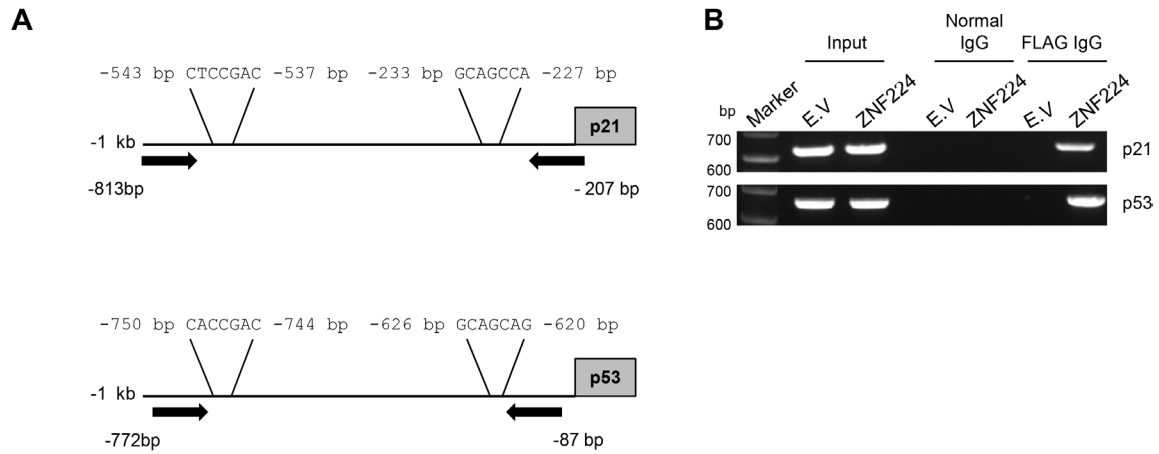

**Supplementary Figure S5: ChIP analysis using FLAG-ZNF224.** **A.** Putative binding sequence of ZNF224 in the promoter region of p21 and p53. Arrow indicates primer binding site for PCR. **B.** FLAG-ZNF224 (5  $\mu$ g) was transfected into HEK293 cells for 24 h, and ChIP assay was performed as described in the Methods section. PCR was performed using p21 and p53 specific primers.

**A**

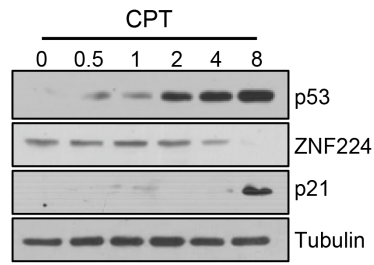

**B**

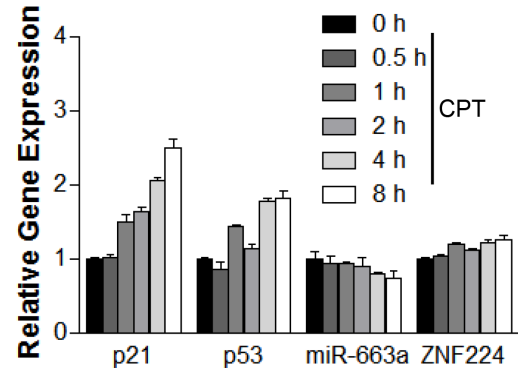

**Supplementary Figure S6: The expression levels of p53 and p21 after CTP treatment.** MCF-7 cells were treated with CPT (0.1 μM) as indicated, and proteins or total RNAs were harvested for immunoblot **A**. or qRT-PCR **B**. Tubulin, U6 and GAPDH were used as loading controls for immunoblot, miR663a and mRNA analyses, respectively.

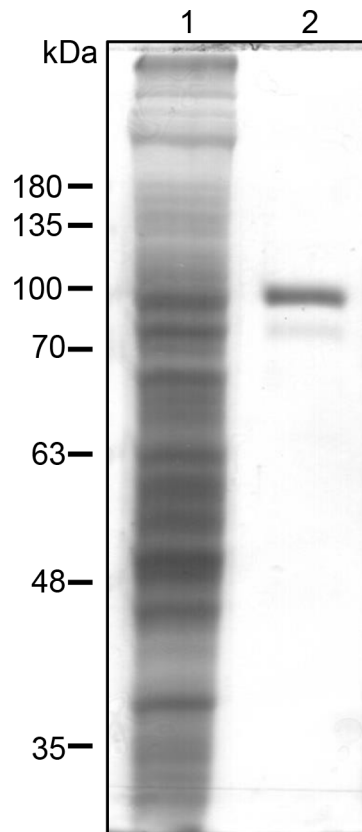

**Supplementary Figure S7: Purification of FLAG-ZNF224.** HEK293 cells were transfected with FLAG-ZNF224 plasmid for 36 h. After cell lysis as described in the Methods section, FLAG-ZNF224 was purified using the anti-FLAG M2 magnetic bead at 4°C (lane 1, whole cell lysate; lane 2, purified FLAG-ZNF224).

**Supplementary Table S1: Genes that contain a ZNF224 enriched region within 1 kb of the transcription start site, within 1 kb of the transcription stop site, and/or within the transcribed sequences**

See Supplementary File 1



Supplementary Table S2: Primers used for RT-PCR

| Primers  | Sequences                                                            |
|----------|----------------------------------------------------------------------|
| GAPDH    | F: 5'-CGAGATCCCTCCAAAATCAA-3'<br>R: 5'-TGTGGTCATGAGTCCTTCCA-3'       |
| GAPDH    | F: 5'-GGGTGTGAACCATGAGAAGTATG-3'<br>R: 5'-GTCCTTCCACGATACCAAAGTTG-3' |
| ZNF224   | F: 5'-CAGAGAGTCCACATGGGAGAG-3'<br>R: 5'-CCCGTGTGGACCATATGATGC-3'     |
| ZNF224   | F: 5'-CACCAGAAGGTCCACACAGG-3'<br>R: 5'-CCCAGCCAAAACCTCTCCCA-3'       |
| P21      | F: 5'-GCAGACCAGCATGACAGATTT-3'<br>R: 5'-GGATTAGGGCTTCTCTTGGA-3'      |
| P53      | F: 5'-CCCAAGCAATGGATGATTTGA-3'<br>R: 5'-GGCATTCTGGGAGCTTCATCT-3'     |
| U6       | F: 5'-GCTTCGGCAGCACATATACTAAA-3'<br>R: 5'-CGCTTACGAATTTGCGTGTTCAT-3' |
| miR-663a | F: 5'-AGCCGCGTCCCAACCCGCTAG-3'<br>R: 5'-CTCGCTTGCAGAGGAACCCTC-3'     |

Supplementary Table S3: Primers used for ChIP qPCR

| Primers   | Sequences                                                        |
|-----------|------------------------------------------------------------------|
| LOC284801 | F: 5'-AGATTTTCTGCCTTGGCACC-3'<br>R: 5'-TGGACTCTCTCAGGTTGAACG-3'  |
| miR-663a  | F: 5'-GCCGCGTCCCAACCCGCTAG-3'<br>R: 5'-ACTCGCTTGCAGAGGAACCC-3'   |
| ROCK1P1   | F: 5'-GCACTGGAAAACCGATCGTC-3'<br>R: 5'-TTCATCAGTGC GGCTTTCAA-3'  |
| SCML1     | F: 5'-CCACAGAGGTAGGATGAGCC-3'<br>R: 5'-ACGGAGA ACTTCCCTGTATGG-3' |
| PPP1R15B  | F: 5'-AGGGAGCACATTTACAGGATGG-3'<br>R: 5'-CAACCGACATTGCTGTTGCT-3' |
| ZDHHC14   | F: 5'-GTAAACGTCCGTGGGGAGAA-3'<br>R: 5'-TCAGGGTCCCCTCCGGCCCCG-3'  |
| miR-3621  | F: 5'-AGCGAGAGTGCCGAGCAGC-3'<br>R: 5'-CTGCTGTTGCTGCTGCTGTCG-3'   |
| miR-663a  | F: 5'-CTTCCGGCGTCCCAGG-3'<br>R: 5'-CGGGCCACCAGGAAAACA-3'         |
| P21       | F: 5'-CAGGCTGGTCTCAAACTCCT-3'<br>R: 5'-GATGTGAGGAAGGCTCAGTGG-3'  |
| P53       | F: 5'-CATCAAGCCCTAGGGCTCCTC-3'<br>R: 5'-ATGGAGTTGGGGAGGAGGGTA-3' |
